# Supplementary material for: The DEAD-box RNA helicase Ddx39ab is essential for myocyte and lens development in zebrafish
Source: Oxford University Press journal article supplement (doi:10.1242/dev.161018), 2018-04-10
Supplement: dev161018supp.pdf [file dev161018supp.pdf]

## Supplementary material

Table S1. Primers sequences and PCR conditions.

[Click here to Download Table S1](#)

Table S2. List of antibodies used for western, CHIP, RIP and immunofluorescence studies.

| Antibody name                                   | Company                              | Dilution                              | Application      |
|-------------------------------------------------|--------------------------------------|---------------------------------------|------------------|
| Anti- $\alpha$ tubulin                          | Santa Cruz Biotechnology (sc-23948)  | 1:2000                                | Western blotting |
| Anti-Nkx2.5                                     | Cell Signaling Technology (8792)     | 1:1000                                | Western blotting |
| Anti-Gata4                                      | Santa Cruz Biotechnology (sc-25310)  | 1:1000                                | Western blotting |
| Anti-Myf5                                       | GeneTex (GTX87746)                   | 1:1000                                | Western blotting |
| Anti-MyoD                                       | Santa Cruz Biotechnology (sc-377460) | 1:500                                 | Western blotting |
| Anti-Mef2C                                      | Cell Signaling Technology (5030)     | 1:1000                                | Western blotting |
| Anti-Histone 3                                  | Cell Signaling Technology (9715)     | 1:1000                                | Western blotting |
| Anti-H3K4Me1                                    | Abcam (ab8895)                       | 1:500                                 | Western blotting |
|                                                 |                                      | 2 $\mu$ g for 25 $\mu$ g of chromatin | CHIP             |
| Anti-Actin                                      | SIGMA (A2172)                        | 1:200                                 | Immunostaining   |
| Anti-Myosin                                     | DSHB (MF20)                          | 1:200                                 | Immunostaining   |
| ANTI-FLAG M2 Affinity Gel                       | SIGMA (A2220)                        | N.A                                   | RIP              |
| Anti-MYH1A                                      | DSHB (F59)                           | 1:50                                  | Immunostaining   |
| Anti-CD166                                      | DSHB (zn8)                           | 1:50                                  | Immunostaining   |
| Anti-TNNT2                                      | Santa Cruz Biotechnology (sc-20025)  | 1:50                                  | Immunostaining   |
| Anti-mouse IgG (H+L),-Alexa Fluor 594 Conjugate | Cell Signaling Technology (8890)     | 1:200                                 | Immunostaining   |
| Anti-Rabbit IgG (H+L)-Alexa Fluor 568 Conjugate | Thermo Fisher (A10042)               | 1:200                                 | Immunostaining   |

Table S3. Significant different expression gene in *ddx39ab* mutant. This file includes Genes that that have  $FDR \leq 0.001$  and Fold Change  $> 2$ .

[Click here to Download Table S3](#)

Table S4. Significant alternative splicing events in *ddx39ab* mutant embryo. Four types of alternative splicing events, including exon skipping, intron retention, 5' and 3' splicing sites usage, were calculated from the RNA-seq data of control and *ddx39ab* mutant embryo (24hpf) by the OLego and Quantas software packages. The spread sheet for each type of events contains 7 columns, including gene accession number, chromosome, strand, constitutive exon, alternative events.

[Click here to Download Table S4](#)

Table S5. Gene Ontology (GO) enrichment analysis of significant different expression gene in *ddx39ab* mutant.  $P < 0.01$ ,  $FDR < 0.05$ .

[Click here to Download Table S5](#)

Table S6. List of Ddx39ab-interacting RNAs identified by RIP-Seq analysis.  $q$  value  $\leq 0.1$ .

[Click here to Download Table S6](#)

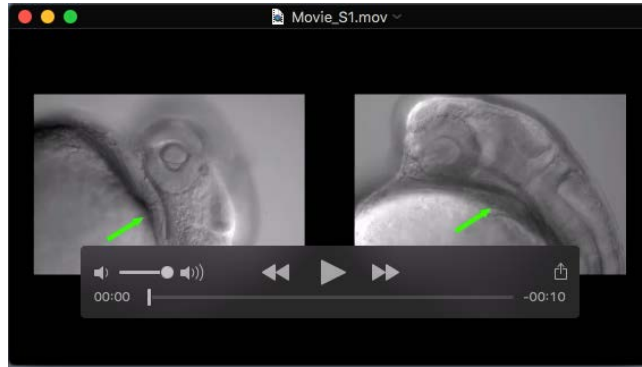

Movie 1. Contraction of the definitive heart tube in RP -011 homozygous and control embryo.

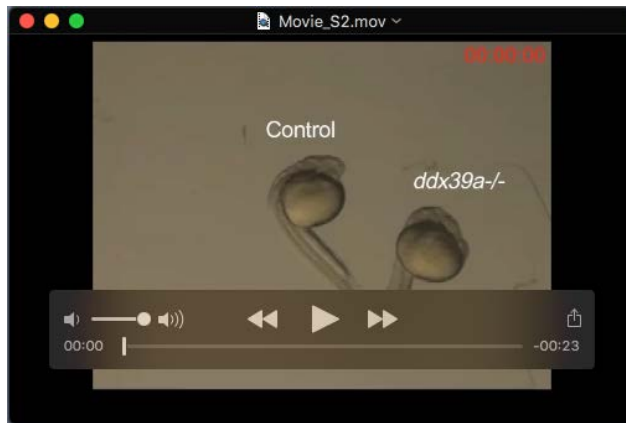

Movie 2. Spontaneous tail movements in RP -011 homozygous and control embryo.

Supplementary figures

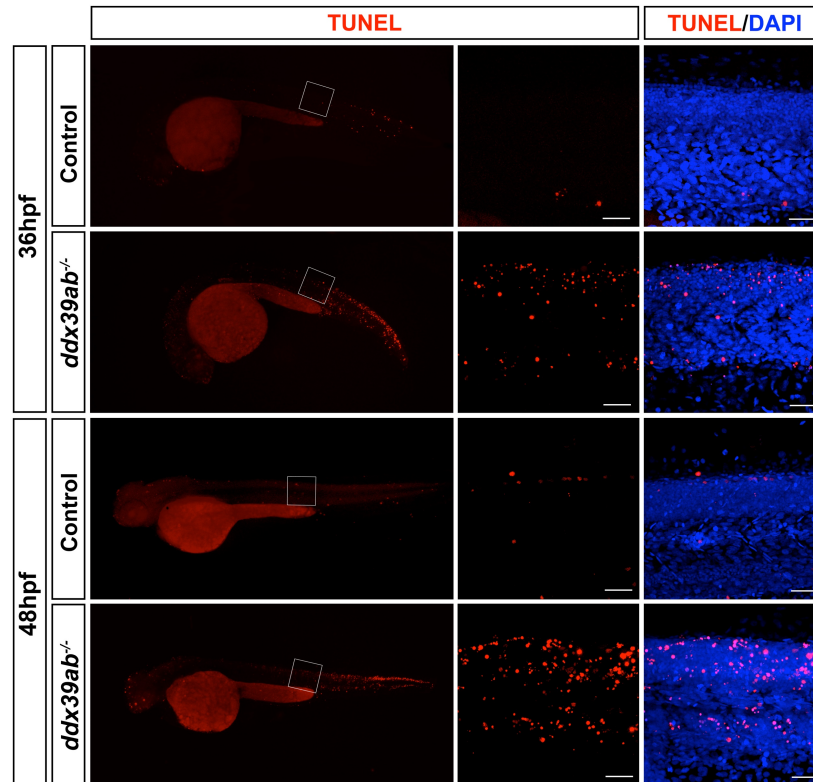

**Supplemental Figure 1. Cell death in wild type or *ddx39ab* mutant embryo.** Right panels, magnified view of the boxed region. Scale bars, 20um. For each stage, at least 10 embryos for each genotype were analyzed and representative samples are shown.

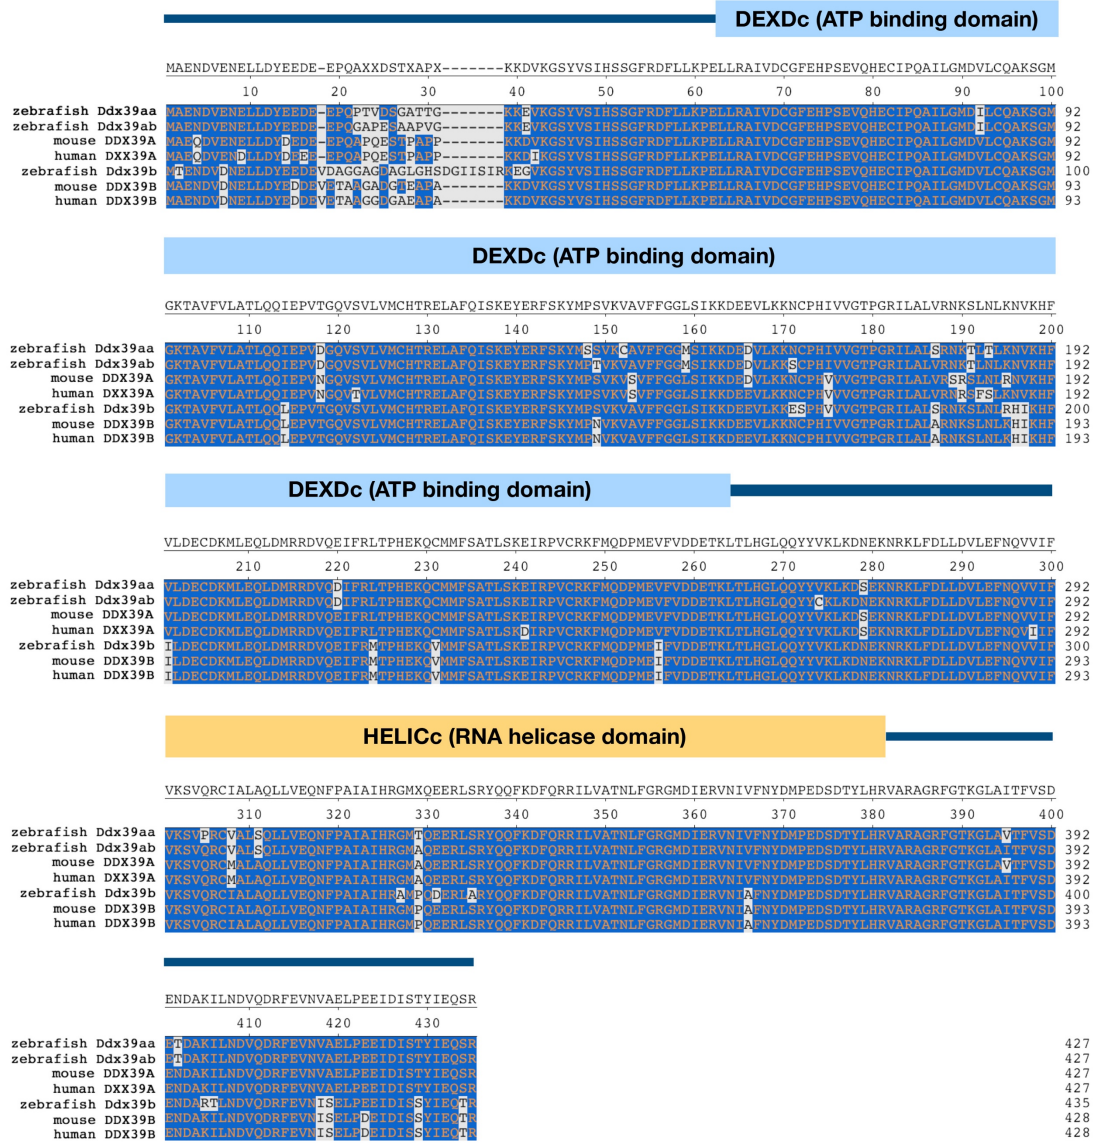

**Supplemental Figure 2. DDX39 protein sequences alignment.** Functional domains are labeled. The orthologs and paralogs of DDX39 in zebrafish, mouse and human share 94% amino acid identity, differing in only 21 residues.

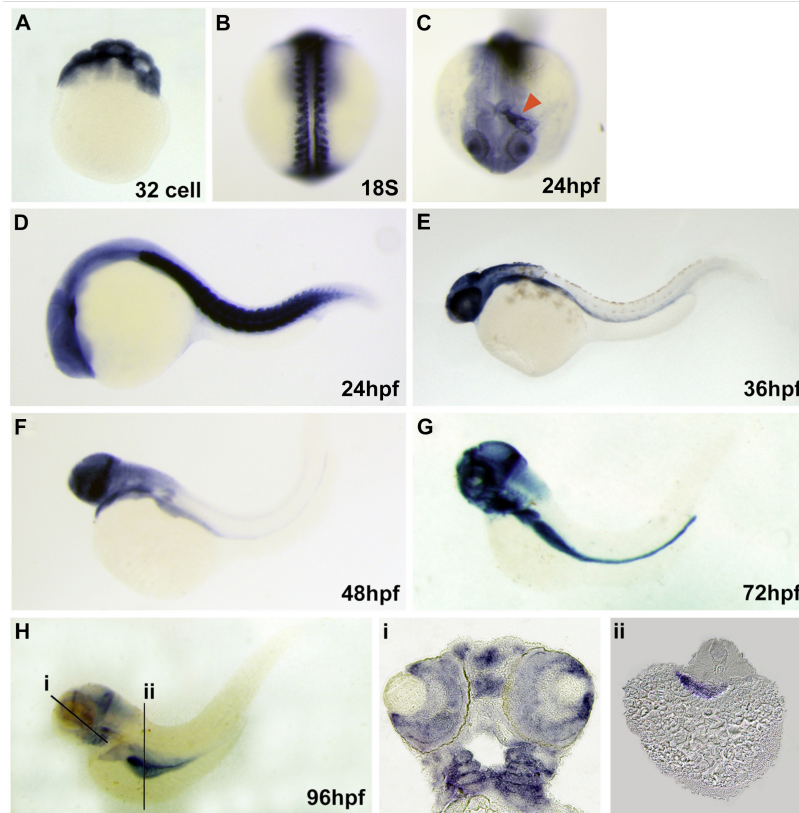

**Supplemental Figure 3. Zebrafish *ddx39ab* embryonic expression pattern.** (A): In situ hybridization experiment revealed there is maternal deposit *ddx39ab* mRNA in early stage embryo. (B): Strong expression of *ddx39ab* could be observed in myotome at 18 somite stage. (C-D): At 24hpf enriched *ddx39ab* mRNA could be observed in lens, heart tube and trunk muscle. Triangle indicated expression in heart tube. (E-H): Later on, the expression was restrained to specific regions in brain, retina (i), pharyngeal arches (i) and endoderm derived organs (ii). A, lateral view. B, dorsal view. C, frontal view. D to H, head to left. i and ii are sections of H as indicated. hpf, hour past fertilization.

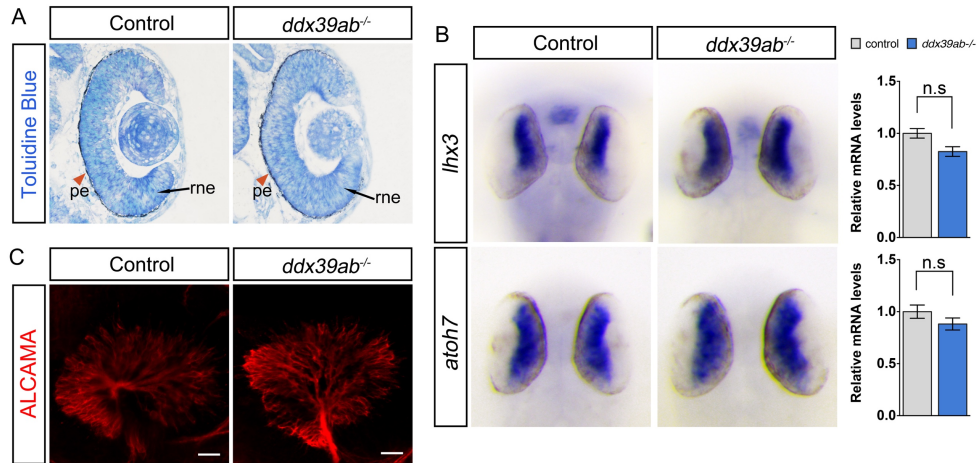

**Supplemental Figure 4. Retina development in *ddx39ab* mutants.** (A): Frontal sections of retina at 32 hpf. (B): RNA *in situ* hybridization and qPCR results are shown for retinal ganglion marker gene expression in control and *ddx39a* mutant zebrafish embryos. Dorsal views with anterior to the top. For qPCR results, data are mean  $\pm$  SEM. ns: not significant. (C): Confocal images of retinal ganglion cell (labeled with zn8 antibody) from wild type and *ddx39ab* mutant embryo at 48 hpf. Scale bars, 20 $\mu$ m. A, B and C, at least 15 embryos for each genotype were analyzed and representative samples are shown.

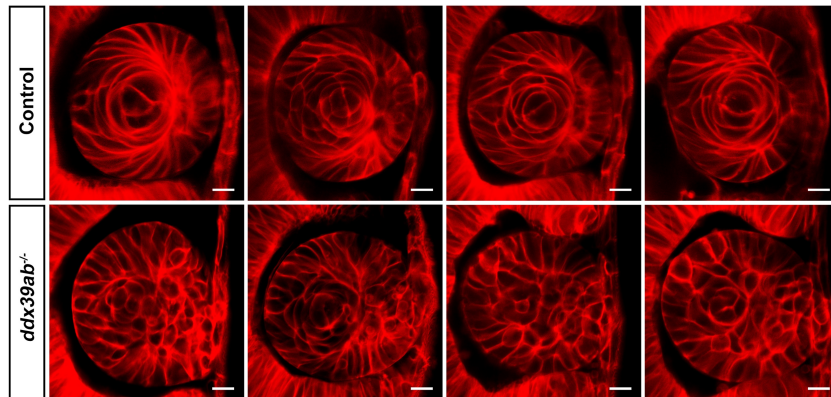

**Supplemental Figure 5. Disorganization of primary lens fiber cell in *ddx39a* embryo.** Cell membrane was labeled with mRFP; living images were taken at 28 hpf. Scale bars, 25  $\mu$ M.



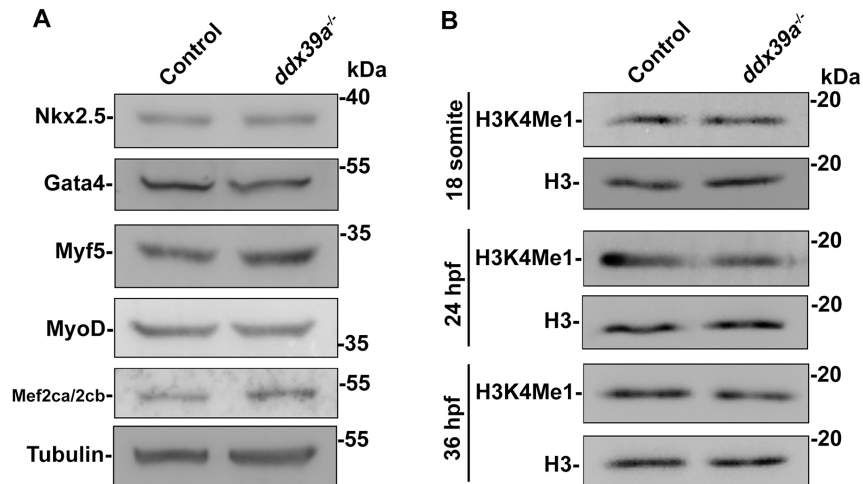

**Supplemental Figure 6. Western blot analysis of the indicated proteins and histone PTMs in control and *ddx39ab* mutant embryo.** (A): protein level of myocyte or cardiomyocyte key transcription regulators showed no evident change between control and *ddx39a* mutant at 24 hpf. (B): In *ddx39ab* mutant, minor decrease on H3K4Me1 level could be detected from 24 hpf.

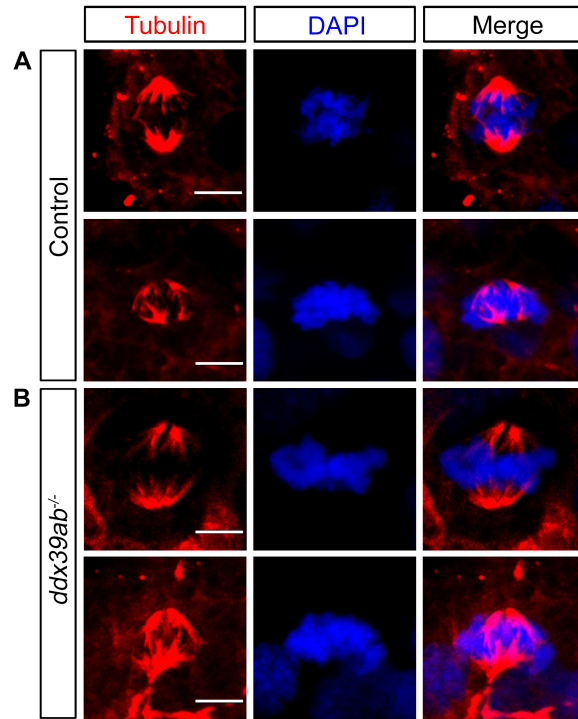

**Supplemental Figure 7. *Ddx39ab* mutant embryos exhibit normal mitoses.** Mitotic cells stained with DAPI (blue) and  $\alpha$ -tubulin (red). Scale bars, 5 $\mu$ m.

## Supplementary Materials and Methods

### Western blotting

Proteins were isolated by homogenizing embryos in RIPA buffer containing protease inhibitor (Sigma). Proteins were separated by sodium dodecyl sulfate-polyacrylamide gel electrophoresis (SDS-PAGE). For immunoblotting, proteins were transferred to polyvinylidene fluoride (PVDF) membrane using an electrophoretic transfer apparatus (Bio-Rad). The membrane was blocked with 1% non-fat milk (Bio-Rad) and incubated with primary antibody followed by 1:10,000 HRP-conjugated secondary antibodies (Sigma). Signal detection was performed using Pico West Chemiluminescent Substrate (Thermo Scientific). Information for primary antibodies are listed in Supplementary Table 2.
